# Supplementary material
Source: PubMed Central journal article supplement (PMC3982151)

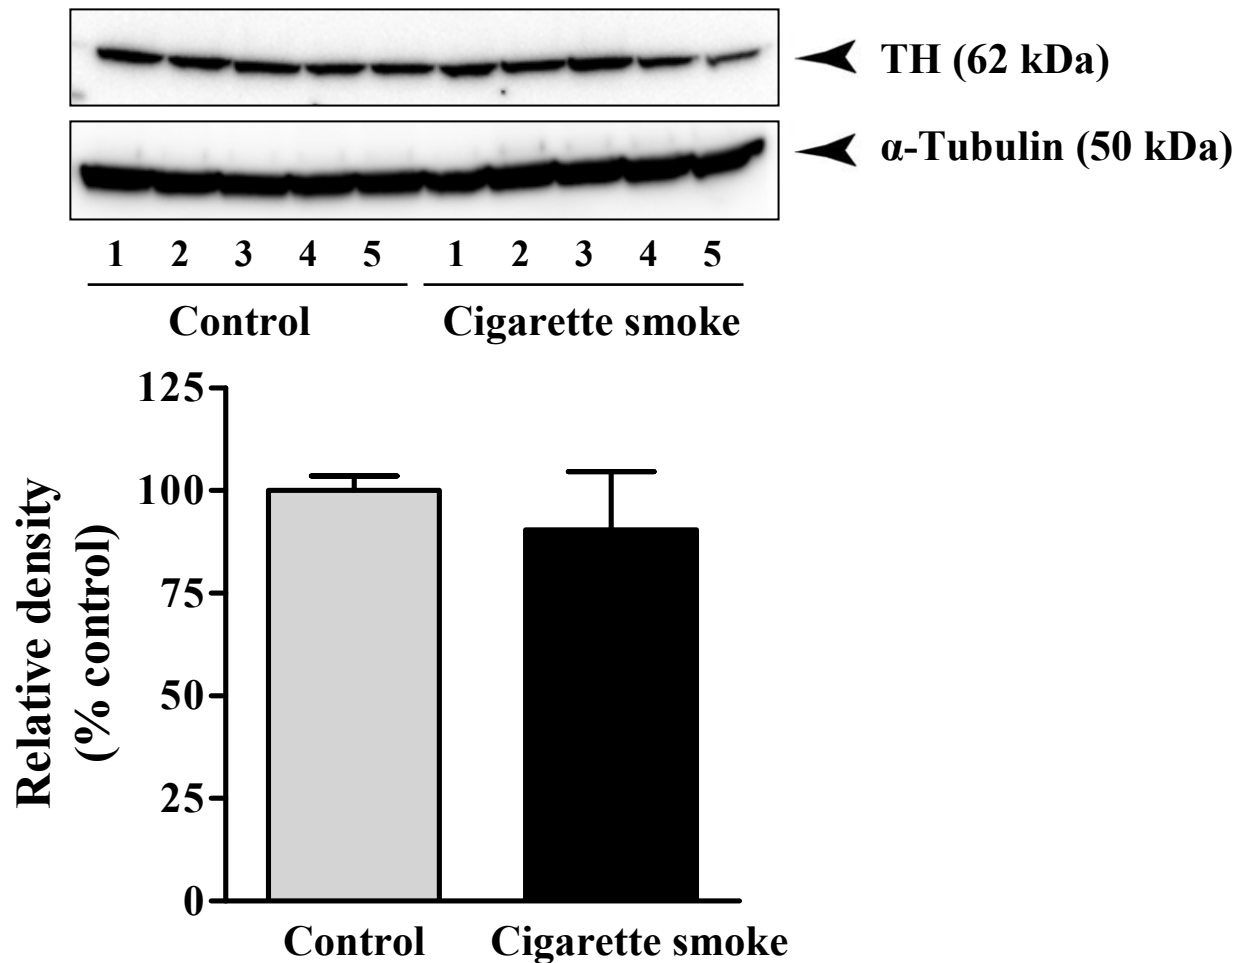

**Figure S1. Prenatal Cigarette Smoke Exposure Has no Effect on Female Tyrosine Hydroxylase Levels.** Western blot analysis of tyrosine hydroxylase (TH) revealed no significant change in striatal TH protein levels in CS-exposed female offspring.

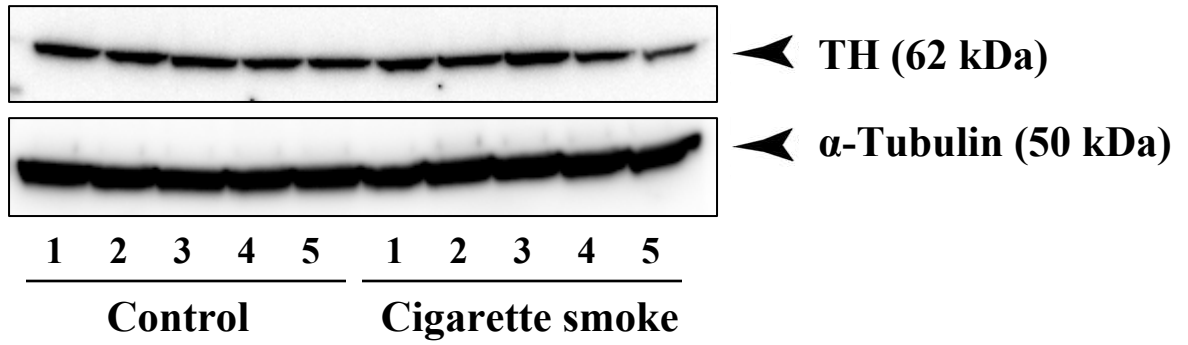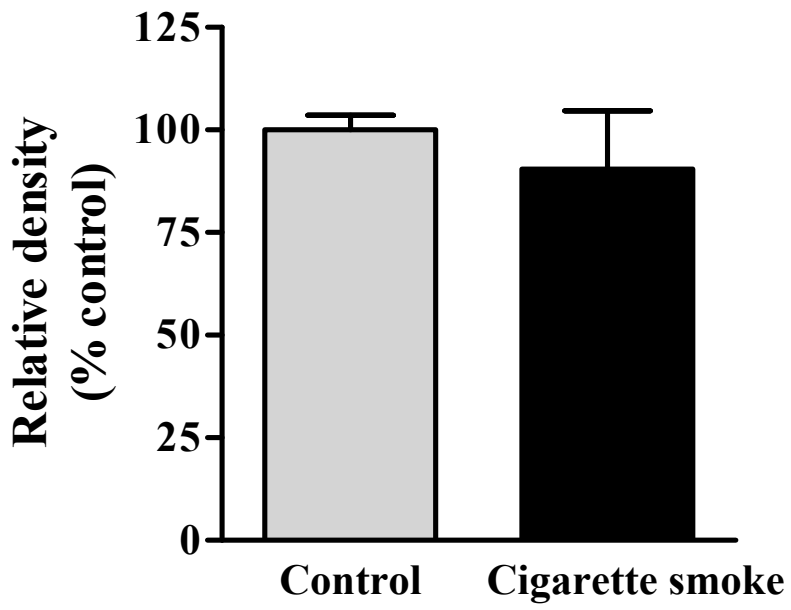

Supplement: NIHMS562590-supplement-01.pdf [file NIHMS562590-supplement-01.pdf]
