# Supplementary material
Source: PubMed Central journal article supplement (PMC3982151)
Supplement: NIHMS562590-supplement-02.pdf [file NIHMS562590-supplement-02.pdf]

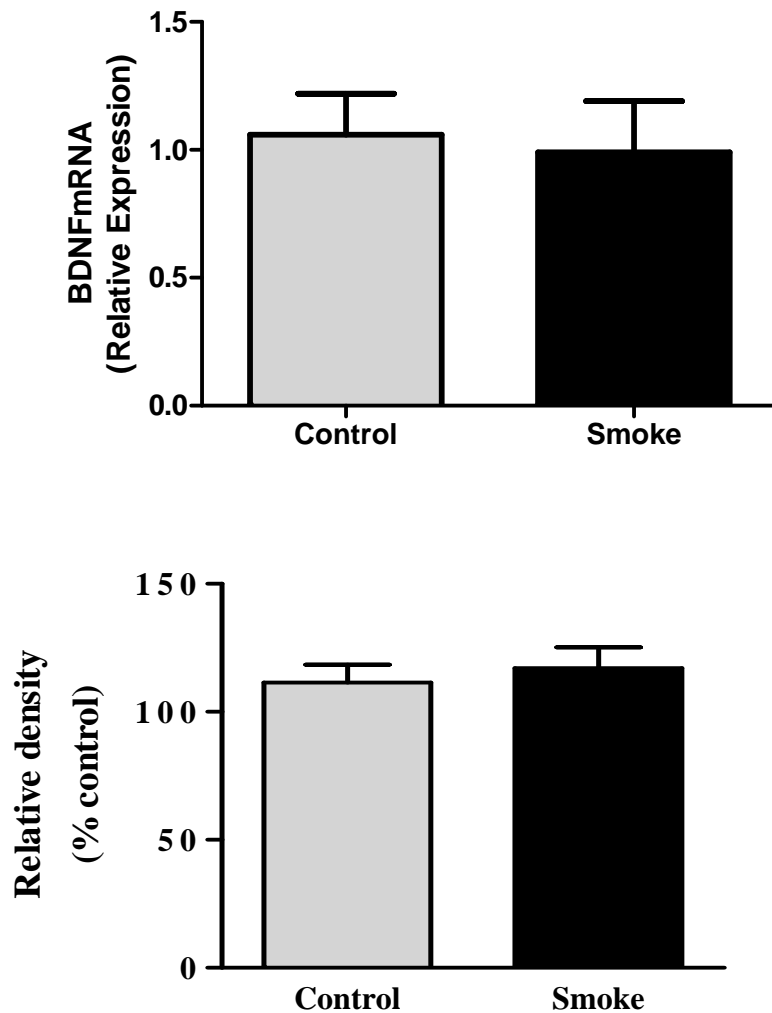

**Figure S2. Prenatal Cigarette Smoke Exposure Does not Effect Female BDNF mRNA and Protein in the Striatum.**

(Top) Striatal BDNFmRNA, as measured by QPCR, was unchanged in female, offspring exposed *in utero* to cigarette smoke (Bottom) Western blot analysis of BDNF revealed no significant change in BDNF protein levels in CS-exposed female offspring.
